# Supplementary material for: TiO2 Nanoparticle/Polyimide Nanocomposite for Ultrahigh-Temperature Energy Storage
Source: MDPI journal article supplement (doi:10.3390/nano12244458), 2022-12-15
Supplement: s1 [file s1]

## Supporting Information

### **TiO<sub>2</sub> nanoparticles/polyimide nanocomposite for ultrahigh-temperature energy storage performance**

Xinrui Chen<sup>1,2</sup>, Wenbo Zhu<sup>1</sup>, Jianwen Chen<sup>2,\*</sup>, Qing Cao<sup>1,2</sup>, Yingxi Chen<sup>1,2</sup>, Dengyan Hu<sup>1,2</sup>

<sup>1</sup>*School of Mechatronics Engineering and Automation College, Foshan University, Foshan, 528200, P. R. China*

<sup>2</sup>*School of Electronic and Information Engineering, Foshan University, Foshan, 528200, P. R. China*

\*To whom correspondence should be addressed. E-mail: iamjwen@126.com

## Figures

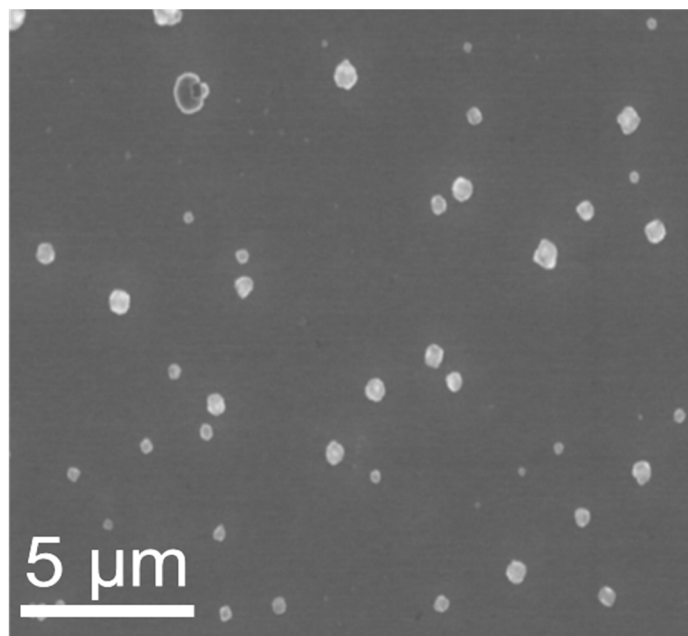

**Figure S1.** SEM image of TiO<sub>2</sub> nanoparticles at low magnification.

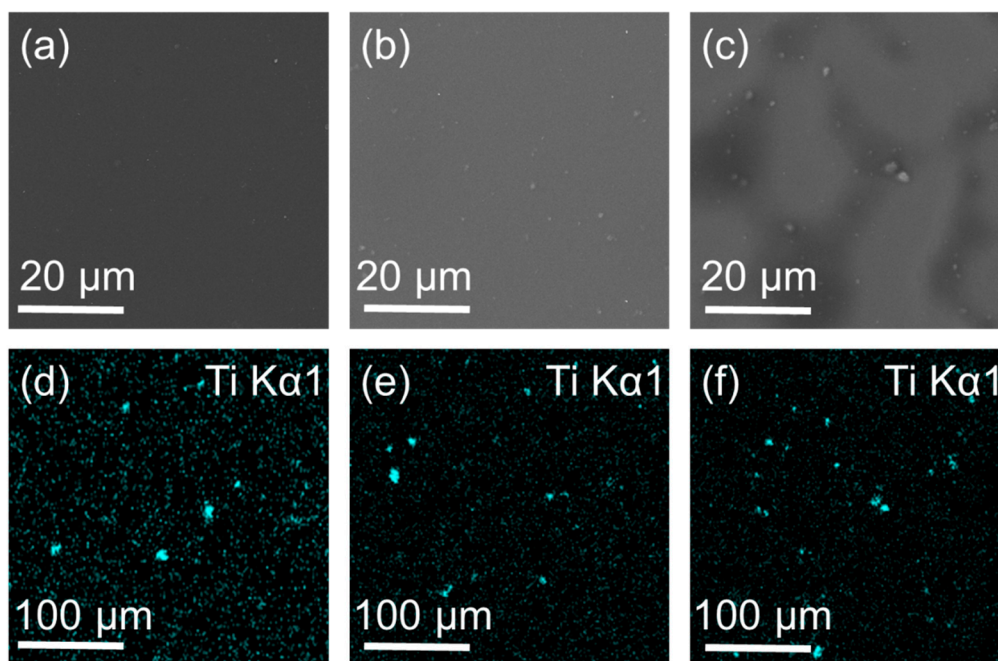

**Figure S2.** Characterization of TiO<sub>2</sub>/PI nanocomposites. (a), (b), (c) SEM image and (d), (e), (f) corresponding respectively EDS mapping of TiO<sub>2</sub>/PI nanocomposites with various loading contents of 1, 2, and 5 wt%.

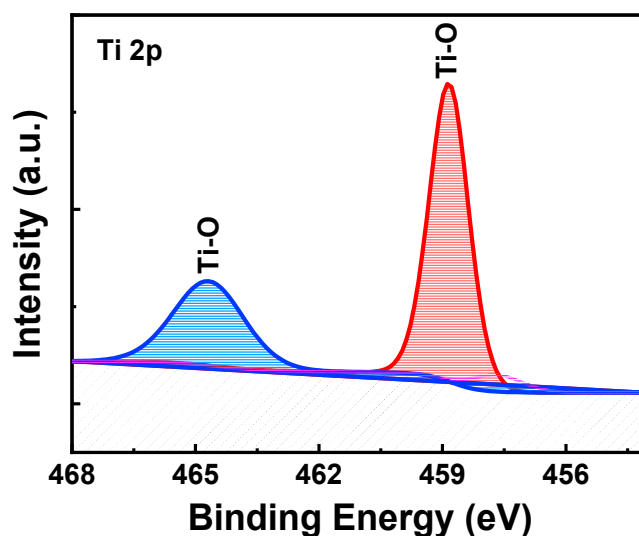

**Figure S3.** XPS spectra of Ti 2p components of TiO<sub>2</sub>/PI nanocomposite.

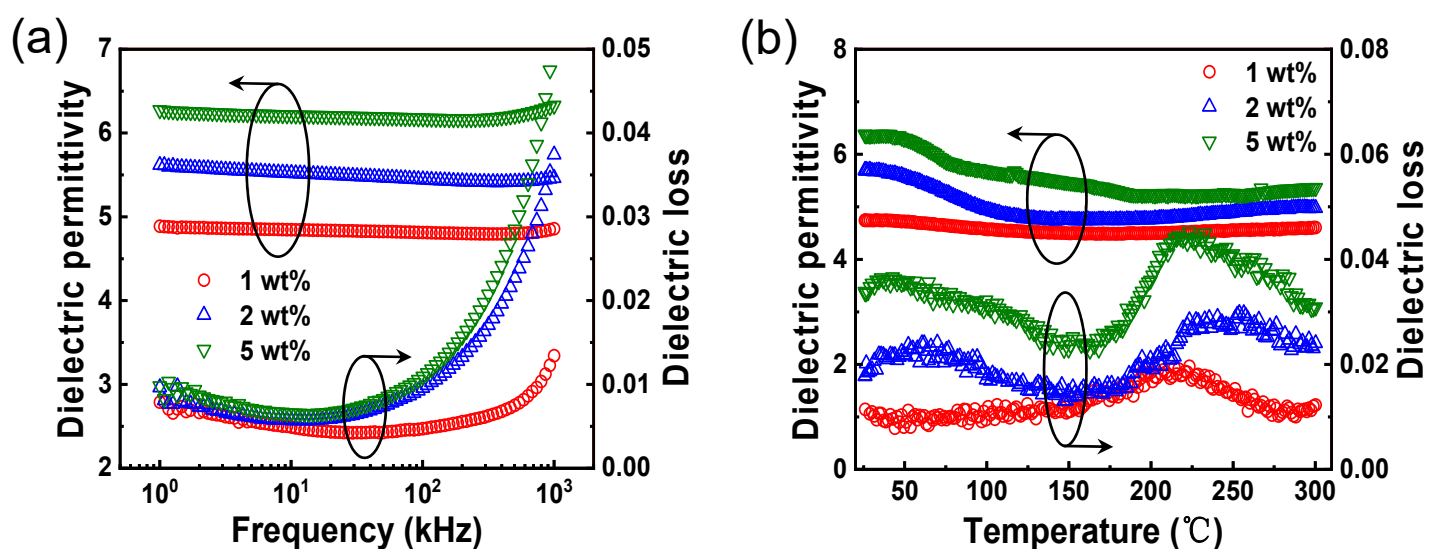

**Figure S4.** Dielectric properties of solid TiO<sub>2</sub>/PI nanocomposites. Frequency-dependent **(a)** dielectric permittivity and dielectric loss of solid TiO<sub>2</sub>/PI nanocomposites with various loading contents of 1, 2, and 5 wt% at RT. Temperature-dependent **(b)** dielectric permittivity and dielectric loss of solid TiO<sub>2</sub>/PI nanocomposites with various loading contents of 1, 2, and 5 wt% at 1 kHz.

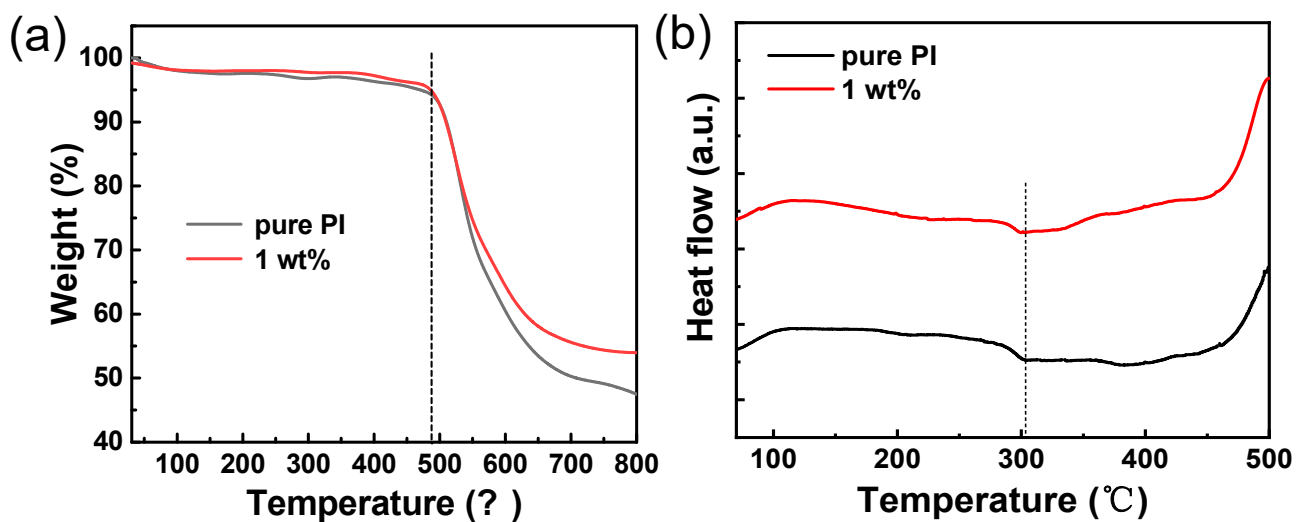

**Figure S5.** (a) TGA at the temperatures of 30 °C to 800 °C and (b) DSC curves at 100 °C to 500 °C of pure PI and TiO<sub>2</sub> nanoparticles/PI nanocomposite with 1 wt% content.

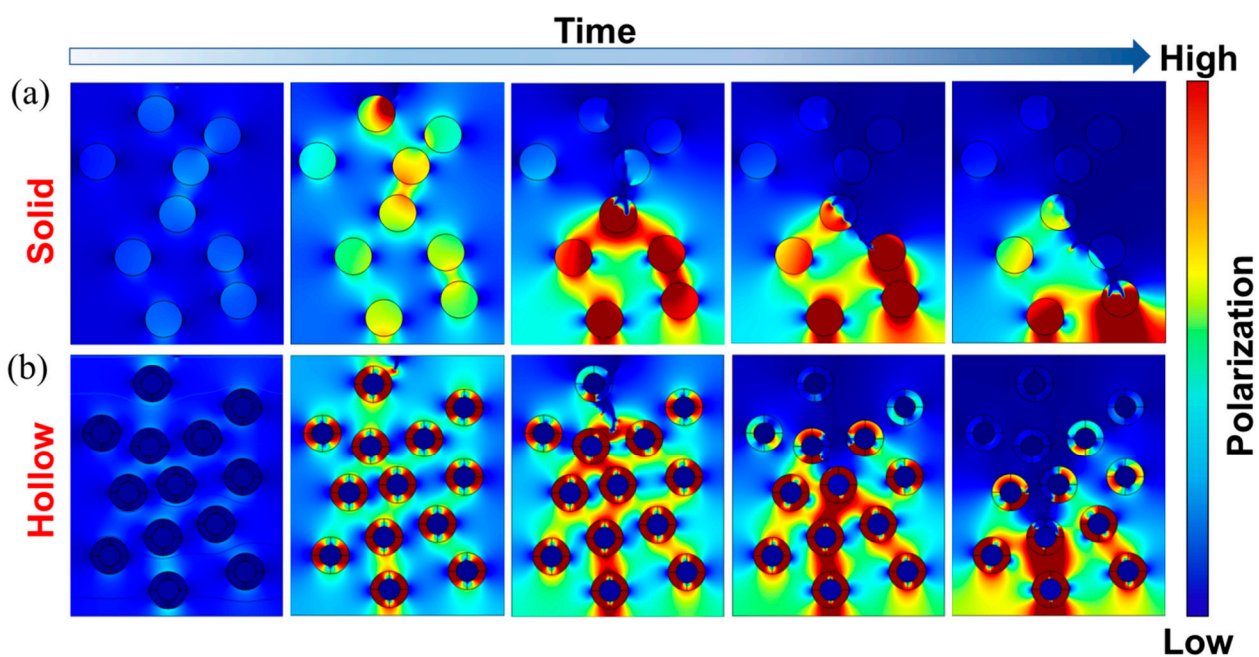

**Figure S6.** Finite element simulation of polarization evolution of TiO<sub>2</sub>/PI nanocomposites with (a) solid and (b) hollow nanofillers.

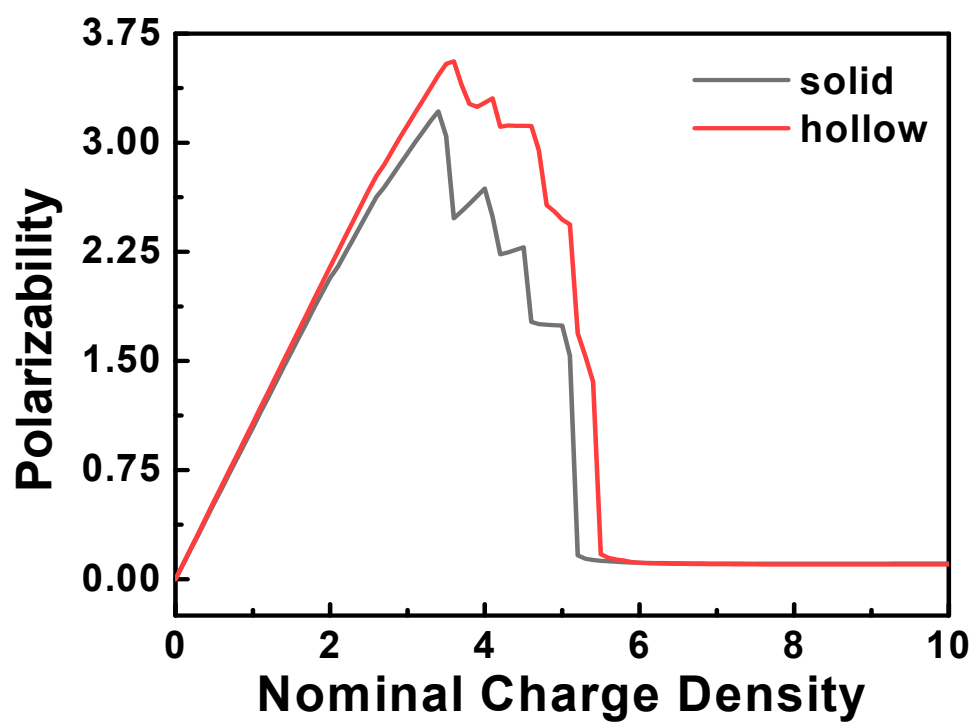

**Figure S7.** Relationship between nominal charge density and polarizability for PI-based nanocomposites with solid (grey curve) and hollow (red curve) nanoparticles.
